# Supplementary material for: Influence of rare earth doping on the structural and electro-magnetic properties of SmFeAsO0.7F0.3 iron pnictide
Source: Royal Society of Chemistry journal article supplement (doi:10.1039/c5qi00047e), 2015-01-01
Supplement: c5qi00047e1.pdf [file c5qi00047e1.pdf]

## **Influence of rare earth doping on the structural and electro-magnetic properties of $\text{SmFeAsO}_{0.7}\text{F}_{0.3}$ iron pnictide**

J. B. Anooja<sup>a</sup>, P. M. Aswathy<sup>a</sup>, Neson Varghese<sup>a</sup>, C.K. Chandrakanth<sup>a</sup>, N. Devendra Kumar<sup>b</sup>, A. Sundaresan<sup>c</sup> and U. Syamaprasad<sup>1,a</sup>

<sup>a</sup>National Institute for Interdisciplinary Science and Technology (CSIR), Trivandrum 695019, India

<sup>b</sup>Department of Engineering, University of Cambridge, Cambridge CB2 1PZ, UK

<sup>c</sup>Chemistry and Physics of Materials Unit, Jawaharlal Nehru Centre for Advanced Scientific Research, Bangalore 560064, India,

### List of Figures

Figure S1 : XRD patterns of (a) Gd doped and (b) Ce doped samples.

Figure S2 : EDAX spectra of the samples (a) SmGd1 ( $\text{Sm}_{0.9}\text{Gd}_{0.1}\text{FeAsO}_{0.7}\text{F}_{0.3}$ ) and (b) SmCe1 ( $\text{Sm}_{0.9}\text{Ce}_{0.1}\text{FeAsO}_{0.7}\text{F}_{0.3}$ ).

Figure S3 : SEM images of Sm3 ( $\text{SmFeAsO}_{0.7}\text{F}_{0.3}$ ) and selected samples from both  $\text{Gd}^{3+}$  and  $\text{Ce}^{3+}$  doped ones.

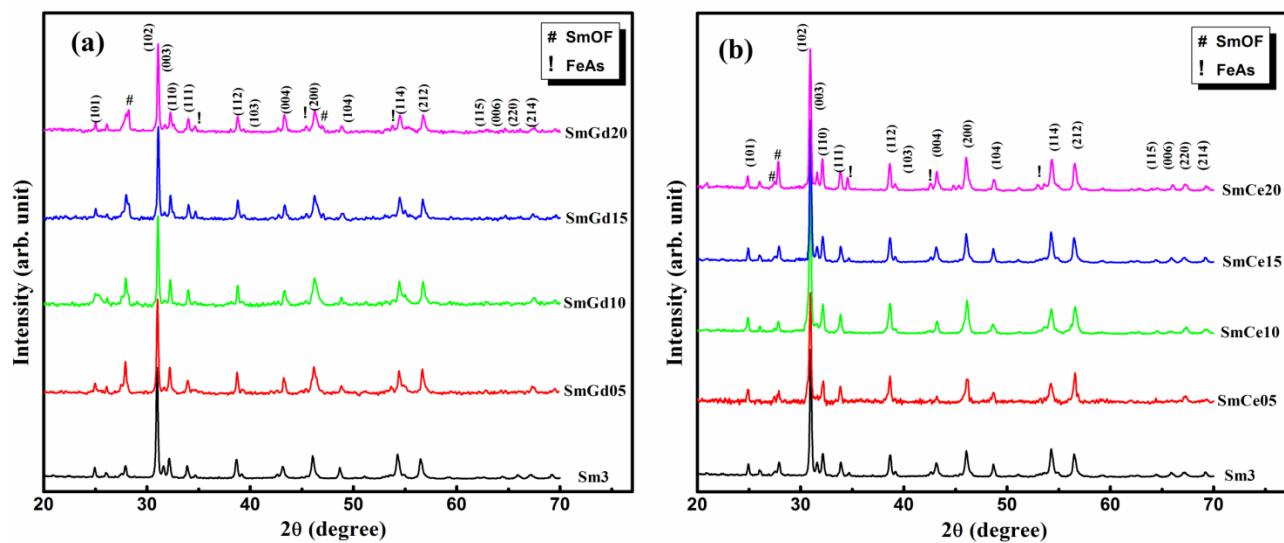

Figure S1: XRD patterns of (a) Gd doped and (b) Ce doped samples.

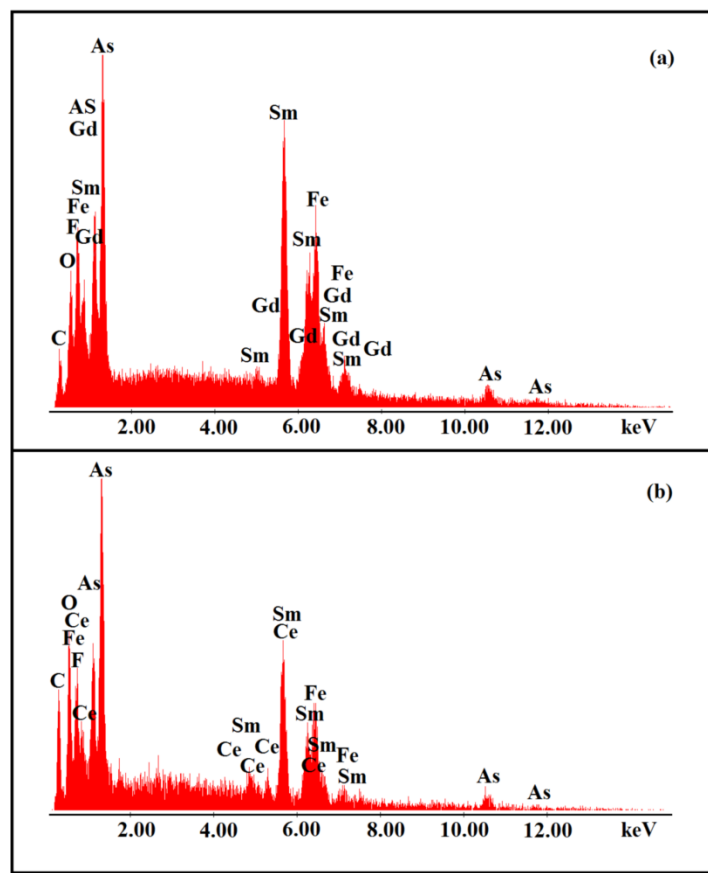

Figure S2: EDAX spectra of the samples (a) SmGd1 ( $\text{Sm}_{0.9}\text{Gd}_{0.1}\text{FeAsO}_{0.7}\text{F}_{0.3}$ ) and (b) SmCe1 ( $\text{Sm}_{0.9}\text{Ce}_{0.1}\text{FeAsO}_{0.7}\text{F}_{0.3}$ ).

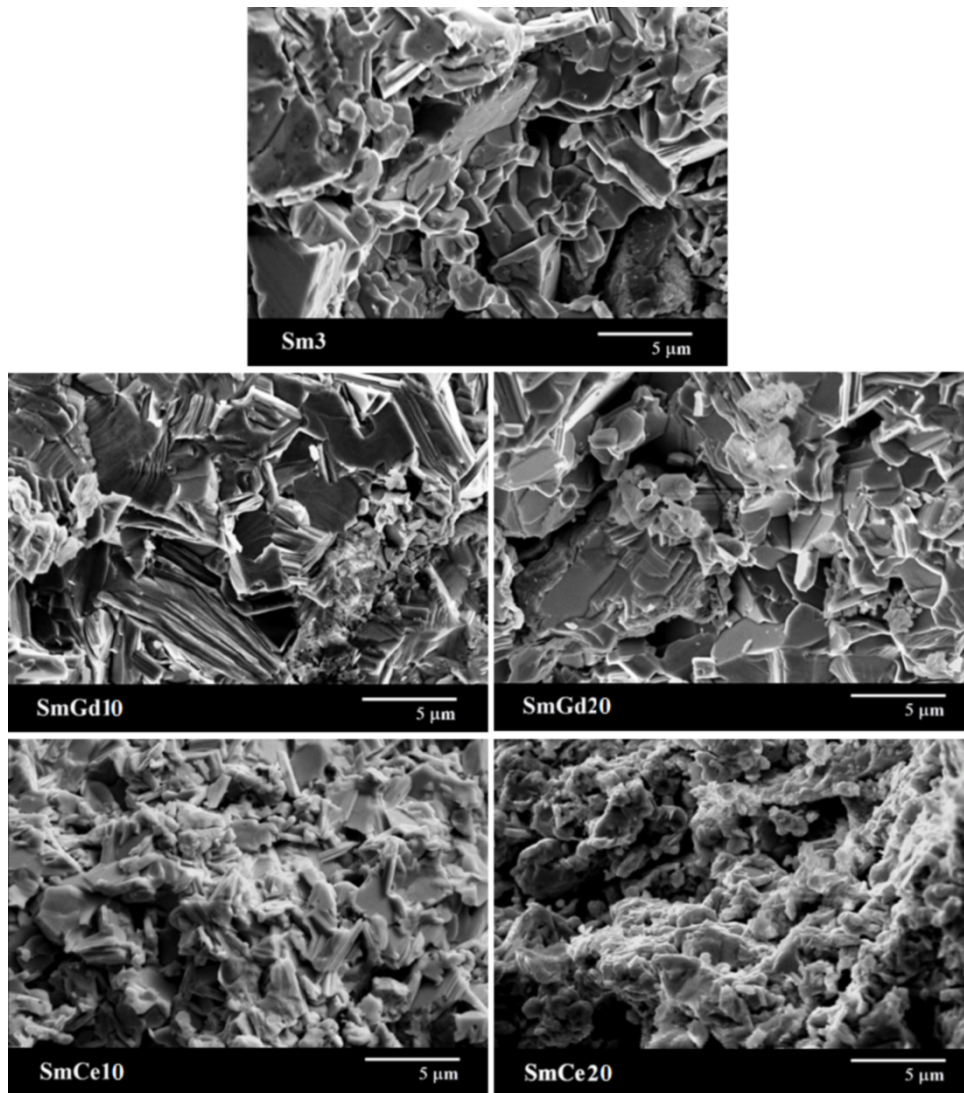

Figure S3: SEM images of Sm3 ( $\text{SmFeAsO}_{0.7}\text{F}_{0.3}$ ) and selected samples from both  $\text{Gd}^{3+}$  and  $\text{Ce}^{3+}$  doped ones.
